# Supplementary material for: DASH Dietary Pattern, Mediation by Mineral Intakes, and the Risk of Coronary Artery Disease and Stroke Mortality
Source: PubMed Central journal article supplement — J Am Heart Assoc. 2019 Feb 26;8(5):e011054. doi: 10.1161/JAHA.118.011054 (PMC6474936; doi:10.1161/jaha.118.011054), 2019-02-26
Supplement: JAH3-8-e011054-s001.pdf [file JAH3-8-e011054-s001.pdf]

# **Supplemental Material**

**Table S1. Cardiovascular mortality cases (and person years) according to quintiles of calcium, potassium, sodium, and magnesium intakes.**

|                    | Quintiles of minerals |                  |                  |                  |                  |
|--------------------|-----------------------|------------------|------------------|------------------|------------------|
|                    | Q1                    | Q2               | Q3               | Q4               | Q5               |
| <b>Calcium</b>     |                       |                  |                  |                  |                  |
| Median, mg/d (IQR) | 242 (194-269)         | 319 (305-333)    | 373 (359-389)    | 449 (425-482)    | 646 (586-746)    |
| Cases/person-years |                       |                  |                  |                  |                  |
| CVD mortality      | 1107/195779           | 1112/195526      | 944/197782       | 827/197576       | 873/193528       |
| CAD mortality      | 615/195779            | 588/195526       | 486/197782       | 448/197576       | 472/193528       |
| Stroke mortality   | 306/195779            | 337/195526       | 282/197782       | 232/197576       | 250/193528       |
| <b>Magnesium</b>   |                       |                  |                  |                  |                  |
| Median, mg/d (IQR) | 205 (193-212)         | 226 (222-230)    | 242 (238-246)    | 259 (254-265)    | 290 (280-308)    |
| Cases/person-years |                       |                  |                  |                  |                  |
| CVD mortality      | 1036/195766           | 1012/197116      | 1007/198002      | 949/196436       | 867/194661       |
| CAD mortality      | 574/195766            | 542/197116       | 521/198002       | 516/196436       | 457/194661       |
| Stroke mortality   | 296/195766            | 294/197116       | 287/198002       | 275/196436       | 261/194661       |
| <b>Sodium</b>      |                       |                  |                  |                  |                  |
| Median, mg/d (IQR) | 702 (539-800)         | 955 (913-994)    | 1102 (1067-1137) | 1252 (1211-1298) | 1507 (1417-1662) |
| Cases/person-years |                       |                  |                  |                  |                  |
| CVD mortality      | 979/197009            | 1021/197371      | 978/196275       | 967/196114       | 926/195213       |
| CAD mortality      | 521/197009            | 548/197371       | 514/196275       | 523/196114       | 504/195213       |
| Stroke mortality   | 276/197009            | 302/197371       | 291/196275       | 275/196114       | 269/195213       |
| <b>Potassium</b>   |                       |                  |                  |                  |                  |
| Median, mg/d (IQR) | 1301 (1132-1400)      | 1579 (1528-1625) | 1755 (1712-1801) | 1955 (1901-2017) | 2306 (2182-2513) |
| Cases/person-years |                       |                  |                  |                  |                  |
| CVD mortality      | 1186/190639           | 1150/194429      | 937/197871       | 879/198913       | 719/200131       |
| CAD mortality      | 663/190639            | 599/194429       | 511/197871       | 460/198913       | 377/200131       |
| Stroke mortality   | 321/190639            | 346/194429       | 288/197871       | 249/198913       | 209/200131       |

IQR: interquartile range, Ca: calcium, Mg: magnesium, Na: sodium, K: potassium, CVD: cardiovascular disease, CAD: coronary artery disease.

**Table S2. Hazard ratio (95% Confidence Interval) of cardiovascular mortality according to calcium, sodium, potassium, and magnesium intakes in simpler multivariable models.**

| Quintiles               | Ca               |                  | Mg               |                  | Na               |                  | K                |                  |
|-------------------------|------------------|------------------|------------------|------------------|------------------|------------------|------------------|------------------|
|                         | Model 1          | Model 2          |
| <b>CVD mortality</b>    |                  |                  |                  |                  |                  |                  |                  |                  |
| Q1                      | 1.00             | 1.00             | 1.00             | 1.00             | 1.00             | 1.00             | 1.00             | 1.00             |
| Q2                      | 1.01 (0.93-1.10) | 0.97 (0.89-1.06) | 0.98 (0.90-1.07) | 0.93 (0.85-1.01) | 1.08 (0.99-1.18) | 1.00 (0.92-1.10) | 1.00 (0.92-1.08) | 0.95 (0.88-1.04) |
| Q3                      | 0.92 (0.84-1.00) | 0.88 (0.80-0.96) | 0.98 (0.90-1.07) | 0.93 (0.85-1.02) | 1.08 (0.99-1.18) | 0.99 (0.91-1.09) | 0.88 (0.81-0.96) | 0.83 (0.76-0.91) |
| Q4                      | 0.86 (0.79-0.94) | 0.83 (0.76-0.91) | 0.95 (0.87-1.04) | 0.90 (0.82-0.99) | 1.18 (1.07-1.29) | 1.04 (0.95-1.14) | 0.89 (0.81-0.97) | 0.85 (0.78-0.93) |
| Q5                      | 0.91 (0.83-0.99) | 0.91 (0.83-1.00) | 0.89 (0.81-0.98) | 0.87 (0.79-0.95) | 1.26 (1.15-1.38) | 1.11 (1.02-1.22) | 0.81 (0.74-0.89) | 0.80 (0.73-0.88) |
| <i>P-trend</i>          | 0.01             | 0.02             | 0.01             | 0.003            | <0.001           | 0.01             | <0.001           | <0.001           |
| <b>CAD mortality</b>    |                  |                  |                  |                  |                  |                  |                  |                  |
| Q1                      | 1.00             | 1.00             | 1.00             | 1.00             | 1.00             | 1.00             | 1.00             | 1.00             |
| Q2                      | 1.00 (0.89-1.12) | 0.95 (0.84-1.07) | 0.97 (0.86-1.09) | 0.91 (0.80-1.02) | 1.11 (0.99-1.26) | 1.04 (0.92-1.17) | 0.95 (0.85-1.06) | 0.91 (0.81-1.02) |
| Q3                      | 0.88 (0.78-1.00) | 0.84 (0.74-0.95) | 0.94 (0.83-1.06) | 0.89 (0.78-1.00) | 1.10 (0.97-1.24) | 1.00 (0.88-1.13) | 0.88 (0.79-0.99) | 0.83 (0.73-0.93) |
| Q4                      | 0.87 (0.77-0.98) | 0.83 (0.73-0.94) | 0.96 (0.85-1.09) | 0.90 (0.80-1.02) | 1.23 (1.08-1.39) | 1.07 (0.94-1.21) | 0.85 (0.75-0.96) | 0.81 (0.71-0.91) |
| Q5                      | 0.93 (0.82-1.05) | 0.91 (0.80-1.03) | 0.88 (0.77-0.99) | 0.83 (0.73-0.94) | 1.30 (1.15-1.47) | 1.12 (0.99-1.27) | 0.78 (0.68-0.88) | 0.76 (0.66-0.86) |
| <i>P-trend</i>          | 0.12             | 0.11             | 0.05             | 0.01             | 0.00             | 0.07             | <0.001           | <0.001           |
| <b>Stroke mortality</b> |                  |                  |                  |                  |                  |                  |                  |                  |
| Q1                      | 1.00             | 1.00             | 1.00             | 1.00             | 1.00             | 1.00             | 1.00             | 1.00             |
| Q2                      | 1.05 (0.90-1.23) | 1.00 (0.85-1.18) | 0.96 (0.82-1.13) | 0.91 (0.77-1.07) | 1.08 (0.92-1.28) | 1.01 (0.85-1.19) | 1.06 (0.91-1.24) | 1.02 (0.87-1.20) |
| Q3                      | 0.94 (0.79-1.10) | 0.90 (0.76-1.06) | 0.93 (0.79-1.09) | 0.89 (0.75-1.05) | 1.09 (0.92-1.29) | 1.01 (0.85-1.20) | 0.97 (0.83-1.14) | 0.93 (0.79-1.09) |
| Q4                      | 0.83 (0.70-0.99) | 0.82 (0.69-0.97) | 0.92 (0.78-1.08) | 0.88 (0.74-1.04) | 1.14 (0.96-1.35) | 1.03 (0.87-1.23) | 0.91 (0.77-1.08) | 0.88 (0.74-1.05) |
| Q5                      | 0.88 (0.74-1.05) | 0.90 (0.76-1.08) | 0.90 (0.76-1.06) | 0.89 (0.75-1.06) | 1.28 (1.08-1.52) | 1.18 (0.99-1.40) | 0.87 (0.73-1.04) | 0.88 (0.73-1.05) |
| <i>P-trend</i>          | 0.03             | 0.10             | 0.17             | 0.21             | 0.00             | 0.06             | 0.04             | 0.05             |

Ca: calcium, Mg: magnesium, Na: sodium, K: potassium, CVD: cardiovascular disease, CAD: coronary artery disease.

Multivariable model 1: adjusted for age, sex, dialect, year of interview, educational level;

Multivariable model 2: further adjusted for body mass index, physical activity, smoking status, alcohol use, history of diabetes, history of hypertension, total energy intake, and dietary supplements use.
